# Supplementary material for: Functional differences between microglia and monocytes after ischemic stroke
Source: Springer Nature journal article supplement (doi:10.1186/s12974-015-0329-1), 2015-05-28

**A**

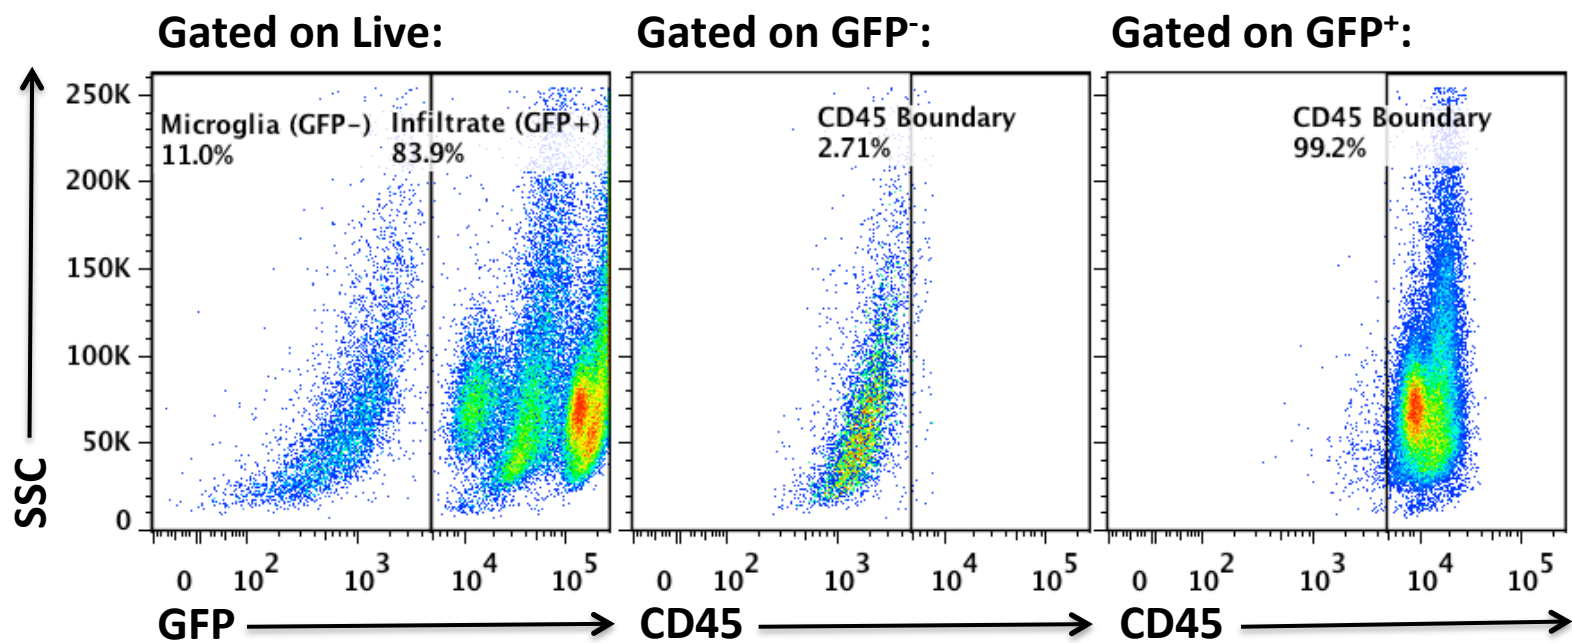

Supplement: MOESM1 [file 9768714]
